# Supplementary material for: A Reporter Assay in Lamprey Embryos Reveals Both Functional Conservation and Elaboration of Vertebrate Enhancers
Source: PubMed Central journal article supplement (PMC3887057; doi:10.1371/journal.pone.0085492), 2014-01-09
Supplement: pone.0085492.s001.pdf [file pone.0085492.s001.pdf]

human ACAGATCTATACAGCACTACCGTTCAGCA-----AGAAAAAGAGAGTTATATTT  
fugu GTAGATCCATACAGTGC GCCTGTGCGGCGTGGGCGTCGCCAGAGAAGGAGGGTTATATTT  
zebrafish GCAGATCCATACGGGCGC-TCGGCTCGGCG-----ATGAAGAGAGCTATATTT  
lamprey GTGGAGCCTTACAATTGTGCAATTCCGCCAGACGGCCTC**ACATTAAGGCGGTGCTTAGG**  
\* \* \* \* \* \* \* \* \* \*

human TCCCCTTGAGTTAGGACGCCTCATGACAAACGATAATGGATAATCAATAAACTGGGAAAT  
fugu TCCCCTTGAGTTAGGACACCTCGTGACAAATGATAATGGATAATCAATAAAGCGGGAAAT  
zebrafish -CCCCT**TGAGTTAGGACACCTCATGACAA**ATGATAATGGATAATCAATAAAGCGGGAAAT  
lamprey GCAGCCAGAGCAAGAACAGCGGTGACAAATGATAATGGGGAATCAATAACGCGAGAAGAT  
\* \* \* \* \* \* \* \* \* \* \* \* \* \* \* \* \* \* \* \*

human ATGAGGCCACAAACTTTTATGAAGCCAAGAGACATATTACTTCTGAACAACACTC--ATTT  
fugu ATGAGGCAGCAAACTTTTATGAAGCCAGGAGACGAATTACTCCCAAACAACACTATGGTTTT  
zebrafish ATGAGGCCGCAAACTTTTATGAAGCCGGGAGACGTATTACTCCCAAACAACACTC--GTTT  
lamprey ATCAAGCAGCTGAGCTTATGAAGCTGGGAGACAAATTGCTGGCCTACAACGCTC--ATTT  
\* \* \* \* \* \* \* \* \* \* \* \* \* \* \* \* \* \* \* \*

human CCCTTAACAAAGTCACTACT-AGACTGTGCCTAATAATCTGAAAGAAAATCAAAGGACCT  
fugu CCCTTAACAAAGTCACTACT-CGACTGTGCCTAATAATCTGAAAGAAAATCAAAGGACCC  
zebrafish CCCTTAACAAAGTCACTCCGGCCGCTGCGCCTAATAATCTGAGGGAAAATCAAAGAAGCC  
lamprey CCCTTAACAAAGTCAACATTGCACTTTTTTACACCGTGTGAAAGAAAATCAAAGAGCCT  
\* \* \* \* \* \* \* \* \* \* \* \* \* \* \* \* \* \* \* \*

human GCAACCACATCAGCAATATTGGCAACTTATTCCACTTTAATGGCATTGATTGATTTTT  
fugu AGAACCACATCAGCAATATTGGCAACTTATTCCACTTTAATGGCATTGATTGATTTTT  
zebrafish GCAACCACATCAGCAATATTGGCAACTTATTCCGCTTTAATGGCATTGATTGATTTTT  
lamprey T--GCCGGGCTGGTAATATTACCGACTT-TTCACTCTAATGGCGTTTTGATTGATTGCC  
\* \* \* \* \* \* \* \* \* \* \* \* \* \* \* \* \* \* \* \*

human CTG-----CC-----TAATGGTAGTTTTTATACTGTACATTTGACGCTGCTTCTGC  
fugu TTT-----CCCCCTTTCCTAATGGTCGTTTTTATA-----GATTGACGCTGCTTCTGC  
zebrafish TCT-----CC-----TTCTAATGGTACTTTTTATA-----GATTGATGCTGGTCTGC  
lamprey CCCACCCACCCCTCACCCCTAATGGTAGTTGTATA-----GATTTTGGAAATGCTTTCTGC  
\* \* \* \* \* \* \* \* \* \* \* \* \* \* \* \* \* \* \* \*

human AAAATAGTTGTGTGTAATAAATCCCGAAGGCAAACA-GTGAACATTAAGGTTCTTGT  
fugu AAAACAGTGGTGTGTAATAAATCCCGAAGGCAAACG-ATAGCCATTAAAGCTCTTGT  
zebrafish AAAACAGCAGTGTGTA**ATAGAGCTCCCGAAGGCTA**GCA-GCCGCCATTAAAGGCTTGT  
lamprey AAAATAGCTGTGTGGGGTAAATCCCGAAGGCAAAAAGTCAAAAATATGAGGCATTT  
\* \* \* \* \* \* \* \* \* \* \* \* \* \* \* \* \* \* \* \*

human CTTACTAGGAATCATAATTGAAGCTTGACCAACATTGCCTTTGGCCTTTTAAAAGAAATC  
fugu CTTACTAGCGCTCATAATTGGAGGTTGACCACTACCACATTTTGGCTCCTCACATAACAC  
zebrafish CTTACCAGGACTCGTAATTGGAGGTTGACCACTATCGCATTTCA-CACATCACACAACAC  
lamprey TTGTGAGCAGCTAAAACTGGAAGCC**GGT-AACATAGCTGATTCACCA**TGAAAAAATGC  
\* \* \* \* \* \* \* \* \* \* \* \* \* \* \* \* \* \* \* \*
