# Supplementary material for: A Reporter Assay in Lamprey Embryos Reveals Both Functional Conservation and Elaboration of Vertebrate Enhancers
Source: PubMed Central journal article supplement (PMC3887057; doi:10.1371/journal.pone.0085492), 2014-01-09
Supplement: pone.0085492.s002.pdf [file pone.0085492.s002.pdf]

human AAAACAACCTTATTTGAAAACTACAAAAA-GTAATTCCATAGAGACTTGCCACTTGACTGA  
 fugu ACTACTACACGTAAAAAAAAAAAAAAAAAATGTAATTCCGTGGAGACAGCCGGTGTGACTGA  
 zebrafish -----TATTTATTTGATTGTTGTTGATTGA  
 lamprey -----CCTTCCGGGCCCGGCCCTCCTGACTGA  
 \*\*\* \*\*

human CACCTGTCATCT-CATGATAAATGACTCCATTTTCTGCCTCT-CTTGCCTTCTGCCACT-  
 fugu CACCTGTCAGCCGGATGATAAATGACTCCATTTTCTGCCTGT-GCTGCCTTCTGCCACCG  
 zebrafish CAGCTGTCGTCCGCATGATGAATGTGTGTGTGTGTGAG-----CGTCTG-----  
 lamprey TACCTGTCACCG-GATGATAAATGACTCAATTTGCTTTGTAATACCGCCTTCTGTCACT-  
 \* \*\*\*\*\* \* \*\*\*\*\* \*\* \* \* \* \* \* \* \* \* \* \* \* \* \* \* \* \* \* \* \* \* \*

human CCAGCAATGGTCATTTATCATCATCT-CTGTCAGCAATGGAAAGCAGCACTGACAGTGCA  
 fugu GCAGCAGTGGCCATTTATCATCATCCGCTGTCAGCCGTGGAAAGCGGCAGTGACAGTGCG  
 zebrafish -CAGCTCTGGTCATCCATCATCGTCTGCTGTCACACACATGAAACG-CGGCGACAGCGCC  
 lamprey GTGGCCCTGGCCATTCATCATCATCC-CTGTCAGTGGCACAAAGTCGCCCTGACAGGGGA  
 \*\* \*\*\* \*\* \*\*\*\*\* \*\* \*\*\*\*\* \*\* \* \* \* \* \* \* \* \* \* \* \* \* \* \* \* \*

human AGTCAGCAAACATTTAGCACATGGAACCACGCA-ACACAGGAAATTATT-ATTGTCAGA  
 fugu AGTCAGCAAACATTTAGCACACGTAGCCGCGCT-ACAAGGGAAATTATT-ATTGTCAGA  
 zebrafish AGTCAGCAAACATTTAGCACAGCGAGCCGACG-GCAGACGGAAATTATT-ATTGTCAGA  
 lamprey AGTTGGCAGCCAGTTACTGCACAACACTAGGCCGACACGGGGAAATCGCAGGATGTTAGC  
 \*\*\* \*\* \* \* \* \* \* \* \* \* \* \* \* \* \* \* \* \* \* \* \* \* \* \* \* \* \* \* \* \*

human ATAATAATG---GTTTAGCATAATTTATTACAGGTC-CACCAAATAAGCAAAGGCTAGA-  
 fugu ATAATAATG---GTTTAGCATAATTTATTACAGGTC-CACCAAATAAGCAGGGGCTAGA-  
 zebrafish ATAATAATG---CTTTAGCATAATTTATTACAGGTC-CGGCAAATACACTGCGGCTCCG-  
 lamprey ATAATAATGGGGGCCCGAGTGATGCATTATCTGTCGCTGCCAATAAGCCGAGGCCAT  
 \*\*\*\*\* \* \* \* \* \* \* \* \* \* \* \* \* \* \* \* \* \* \* \* \* \* \* \* \* \* \* \* \*

human -TGTTATTAGACAGATGGATGGGTAGGCTTGGCAGGCCTCCACCGAGACGCAGGCGG---  
 fugu -TGTTATTAGACAGATGGATGGGAAGACTTGGCAGACATCCACTGAGACTCGGCCAGGCC  
 zebrafish -TGCTATTAGACAGATGGAGAGGCCAGACCGGCAGAAACACACACACA-----  
 lamprey CTGCAGCCGGGCAGATGGGCACACCAAAACGGGCAGGCTAGCGGAAGGGG-----  
 \*\* \* \*\*\*\*\* \* \* \* \* \* \* \* \* \* \* \* \* \* \* \* \* \* \* \* \* \* \*
